# Supplementary material for: A QTL associated with leaf trichome traits has a major influence on the abundance of the predatory mite Typhlodromus pyri in a hybrid grapevine population
Source: PubMed Central journal article supplement (PMC6804712; doi:10.1038/s41438-019-0169-8), 2019-07-21
Supplement: 41438_2019_169_MOESM1_ESM.pdf [file 41438_2019_169_MOESM1_ESM.pdf]

Additional file 1 - *Arabidopsis thaliana* genes involved in the trichome developmental pathway

| Gene Name | Description                                                                                   | NCBI Protein accession number |
|-----------|-----------------------------------------------------------------------------------------------|-------------------------------|
| ATMYBL2   | MYB-LIKE 2; DNA binding / transcription factor                                                | [NCBI:NP_177259.1]            |
| ATMYC1    | MYC-RELATED TRANSCRIPTION FACTOR 1; DNA binding / transcription factor                        | [NCBI:NP_001154194.1]         |
| CPC       | CAPRICE; DNA binding / transcription factor                                                   | [GenBank:AAS09991.1]          |
| CPR5      | CONSTITUTIVE EXPRESSION OF PR GENES 5                                                         | [NCBI:NP_569003.1]            |
| EGL3      | ENHANCER OF GLABRA3; DNA binding                                                              | [NCBI:NP_001185302.1]         |
| ETC1      | ENHANCER OF TRY AND CPC 1; DNA binding / transcription factor                                 | [NCBI:NP_171645.1]            |
| ETC2      | ENHANCER OF TRY AND CPC 2                                                                     | [NCBI:NP_850145.1]            |
| ETC3      | ENHANCER OF TRY AND CPC 3; DNA binding / transcription factor                                 | [NCBI:NP_974493.1]            |
| GAI       | GA INSENSITIVE; transcription factor                                                          | [NCBI:NP_172945.1]            |
| GIS       | GLABROUS INFLORESCENCE STEMS; nucleic acid binding / transcription factor/ zinc ion binding   | [NCBI:NP_191366.1]            |
| GIS2      | GLABROUS INFLORESCENCE STEMS 2; nucleic acid binding / transcription factor/ zinc ion binding | [NCBI:NP_196283.1]            |
| GL1       | GLABRA 1; transcription factor                                                                | [NCBI:NP_189430.1]            |
| GL2       | GLABRA 2; DNA binding / transcription factor                                                  | [NCBI:NP_001185443.1]         |
| GL3       | GLABRA 3; transcription factor                                                                | [NCBI:NP_680372.1]            |
| MYB23     | MYB DOMAIN PROTEIN 2; DNA binding / transcription factor                                      | [NCBI:NP_198849.1]            |
| MYB5      | TRANSCRIPTION REPRESSOR MYB5                                                                  | [NCBI:NP_187963.1]            |
| RGA1      | REPRESSOR OF GA1-3 1; transcription factor                                                    | [NCBI:NP_178266.1]            |
| RGL1      | RGA-LIKE 1; transcription factor                                                              | [NCBI:NP_176809.1]            |
| SAD2      | SUPER SENSITIVE TO ABA AND DROUGHT 2; protein transporter                                     | [NCBI:NP_180724.2]            |
| SPL8      | SQUAMOSA PROMOTER BINDING PROTEIN-LIKE 8; DNA binding                                         | [NCBI:NP_683267.1]            |
| SPY       | SPINDLY; transferase, transferring glycosyl groups                                            | [NCBI:NP_187761.1]            |
| TCL1      | TRICHOMELESS1; DNA binding                                                                    | [NCBI:NP_001031445.1]         |
| TCL2      | TRICHOMELESS 2                                                                                | [NCBI:NP_001118417.1]         |
| TRY       | TRIPTYCHON; DNA binding / transcription factor                                                | [NCBI:NP_200132.2]            |
| TT8       | TRANSPARENT TESTA 8; DNA binding / transcription factor                                       | [NCBI:NP_192720.2]            |
| TTG1      | TRANSPARENT TESTA GLABRA 1; nucleotide binding                                                | [NCBI:NP_851069.1]            |
| TTG2      | TRANSPARENT TESTA GLABRA 2; transcription factor                                              | [NCBI:NP_181263.2]            |
| ZFP8      | ZINC FINGER PROTEIN 8; nucleic acid binding / transcription factor/ zinc ion binding          | [NCBI:NP_181725.1]            |
