# Supplementary material for: A QTL associated with leaf trichome traits has a major influence on the abundance of the predatory mite Typhlodromus pyri in a hybrid grapevine population
Source: PubMed Central journal article supplement (PMC6804712; doi:10.1038/s41438-019-0169-8), 2019-07-21
Supplement: 41438_2019_169_MOESM2_ESM.pdf [file 41438_2019_169_MOESM2_ESM.pdf]

Additional file 2 - BLASTp statistics between *Arabidopsis thaliana* gene products involved in the trichome regulatory pathway (Additional file 1) on to predicted proteins of *Vitis vinifera* PN40024 genome (Version 2.1, Vitulo et al., 2014) located within phytoseiid and trichome abundance quantitative trait loci (QTL) supported intervals.

| Candidate Gene ( <i>Vitis</i> ) | Query ( <i>A thaliana</i> in trichome pathway) | Query gene name | Identity | Alignment length | # Mismatch | Gap opens | e-value                | Bit score | Associated QTL                                                                     |
|---------------------------------|------------------------------------------------|-----------------|----------|------------------|------------|-----------|------------------------|-----------|------------------------------------------------------------------------------------|
| VIT_201s0127g00730.1            | GI 15232860<br>ref NP_189430.1                 | GL1             | 76.36    | 110              | 26         | 0         | 8.0*10 <sup>-55</sup>  | 178       | Phytoseiid<br>Hairs on blade                                                       |
| VIT_201s0127g00730.1            | GI 15242649<br>ref NP_198849.1                 | MYB23           | 77.27    | 110              | 25         | 0         | 4.0*10 <sup>-58</sup>  | 186       | Phytoseiid, Hairs on blade                                                         |
| VIT_201s0026g00850.1            | GI 15240118<br>ref NP_196283.1                 | GIS2            | 36.27    | 102              | 46         | 1         | 2.0*10 <sup>-14</sup>  | 70        | Phytoseiid, Domatia (rating),<br>Domatia (size), Hairs on blade,<br>Hairs on veins |
| VIT_201s0026g00850.1            | GI 15227472<br>ref NP_181725.1                 | ZFP8            | 35.04    | 117              | 63         | 3         | 9.0*10 <sup>-12</sup>  | 64        | Phytoseiid, Domatia (rating),<br>Domatia (size), Hairs on blade,<br>Hairs on veins |
| VIT_201s0010g02270.1            | GI 15226311<br>ref NP_178266.1                 | RGA1            | 34.09    | 396              | 227        | 11        | 4.0*10 <sup>-69</sup>  | 236       | Phytoseiid, Domatia (rating),<br>Bristles on blades, Bristles on<br>veins.         |
| VIT_201s0010g02270.1            | GI 15219630<br>ref NP_176809.1                 | RGL1            | 34.79    | 388              | 229        | 10        | 9.0*10 <sup>-73</sup>  | 244       | Phytoseiid, Domatia (rating),<br>Bristles on veins, Bristles on<br>blades          |
| VIT_02s0012g02030.t01           | GI 334184032<br>Ref<br>NP_001185443.1          | GL2             | 38.95    | 742              | 374        | 20        | 7.0*10 <sup>-161</sup> | 490       | Hairs on veins                                                                     |
| VIT_05s0077g01390.t01           | GI 15240118<br>ref NP_196283.1                 | GIS2            | 40.54    | 74               | 34         | 1         | 1.0*10 <sup>-11</sup>  | 60        | Hairs on blades                                                                    |
| VIT_208s0007g06870.1            | GI 15230939<br>ref NP_191366.1                 | GIS             | 44.28    | 271              | 100        | 14        | 2.0*10 <sup>-48</sup>  | 163       | Hairs on blades                                                                    |
| VIT_208s0007g06870.1            | GI 15240118<br>ref NP_196283.1                 | GIS2            | 41.2     | 233              | 92         | 9         | 2.0*10 <sup>-37</sup>  | 132       | Hairs on blades                                                                    |
| VIT_208s0007g06870.1            | GI 15227472<br>ref NP_181725.1                 | ZFP8            | 42.91    | 275              | 102        | 11        | 3.0*10 <sup>-50</sup>  | 168       | Hairs on blades                                                                    |

| Candidate Gene ( <i>Vitis</i> ) | Query ( <i>A thaliana</i> in trichome pathway) | Query gene name | Identity | Alignment length | # Mismatch | Gap opens | e-value               | Bit score | Associated QTL                                          |
|---------------------------------|------------------------------------------------|-----------------|----------|------------------|------------|-----------|-----------------------|-----------|---------------------------------------------------------|
| VIT_208s0007g07230.1            | GI 15231271<br>ref NP_187963.1                 | MYB5            | 56.08    | 255              | 67         | 7         | 2.0*10 <sup>-85</sup> | 261       | Hairs on blades                                         |
| VIT_15s0021g02290.t01           | GI 22329284<br>ref NP_683267.1                 | SPL8            | 52.8     | 125              | 45         | 2         | 3.0*10 <sup>-33</sup> | 128       | Domatia (size)                                          |
| VIT_215s0021g02300.1            | GI 22329284<br>ref NP_683267.1                 | SPL8            | 50.42    | 355              | 103        | 12        | 2.0*10 <sup>-88</sup> | 272       | Domatia (size)                                          |
| VIT_15s0048g02000.t01           | GI 334184032<br>ref NP_001185443.1             | GL2             | 41.76    | 795              | 371        | 17        | 0                     | 588       | Domatia (size), Domatia (rating),<br>Bristles on blades |
| VIT_215s0046g00170.1            | GI 15231271<br>ref NP_187963.1                 | MYB5            | 62.35    | 162              | 45         | 1         | 8.0*10 <sup>-66</sup> | 209       | Domatia (rating)                                        |
| VIT_215s0046g01130.1            | GI 41618962<br>gb AAS09991.1                   | CPC             | 62.35    | 85               | 31         | 1         | 2.0*10 <sup>-27</sup> | 99        | Domatia (rating)                                        |
| VIT_215s0046g01130.1            | GI 30684581<br>ref NP_850145.1                 | ETC2            | 65.15    | 66               | 23         | 0         | 5.0*10 <sup>-25</sup> | 93        | Domatia (rating)                                        |
| VIT_215s0046g01130.1            | GI 42572793<br>ref NP_974493.1                 | ETC3            | 63.89    | 72               | 25         | 1         | 2.0*10 <sup>-23</sup> | 88        | Domatia (rating)                                        |
| VIT_215s0046g01130.1            | GI 79323486<br>ref NP_001031445.1              | TCL1            | 70.91    | 55               | 16         | 0         | 3.0*10 <sup>-23</sup> | 88        | Domatia (rating)                                        |
| VIT_215s0046g01130.1            | GI 186504271<br>ref NP_001118417.1             | TCL2            | 55.42    | 83               | 36         | 1         | 2.0*10 <sup>-23</sup> | 89        | Domatia (rating)                                        |
| VIT_215s0046g01130.1            | GI 30696297<br>ref: NP_200132.2                | TRY             | 70.73    | 82               | 24         | 0         | 2.0*10 <sup>-31</sup> | 110       | Domatia (rating)                                        |
